# Supplementary material
Source: PubMed Central journal article supplement (PMC4066917)
Supplement: ac500478g_si_001.pdf [file ac500478g_si_001.pdf]

## Supporting Information

### Glucose Oxidase-Catalyzed Growth of Gold Nanoparticles Enables Quantitative Detection of Attomolar Cancer Biomarkers

*Dingbin Liu,<sup>\*†</sup> Jie Yang,<sup>†</sup> He-Fang Wang,<sup>†</sup> Zhongliang Wang,<sup>\*‡</sup> Xinglu Huang,<sup>‡</sup> Zhantong Wang,<sup>§</sup> Gang Niu,<sup>‡</sup> A. R. Hight Walker,<sup>¶</sup> and Xiaoyuan Chen<sup>\*‡</sup>*

*<sup>†</sup> State Key Laboratory of Medicinal Chemical Biology, Collaborative Innovation Center of Chemical Science and Engineering, and Research Center for Analytical Sciences, College of Chemistry, Nankai University, Tianjin (China)*

*<sup>‡</sup>Laboratory of Molecular Imaging and Nanomedicine (LOMIN), National Institute of Biomedical Imaging and Bioengineering (NIBIB), National Institutes of Health (NIH), Bethesda, Maryland 20892 (USA)*

*<sup>§</sup> State Key Laboratory of Molecular Vaccinology and Molecular Diagnostics & Center for Molecular Imaging and Translational Medicine, School of Public Health, Xiamen University, Xiamen 361005 (China)*

*<sup>¶</sup>Optical Technology Division, Physics Laboratory, National Institute of Standards and Technology, Gaithersburg, Maryland 20899 (USA)*

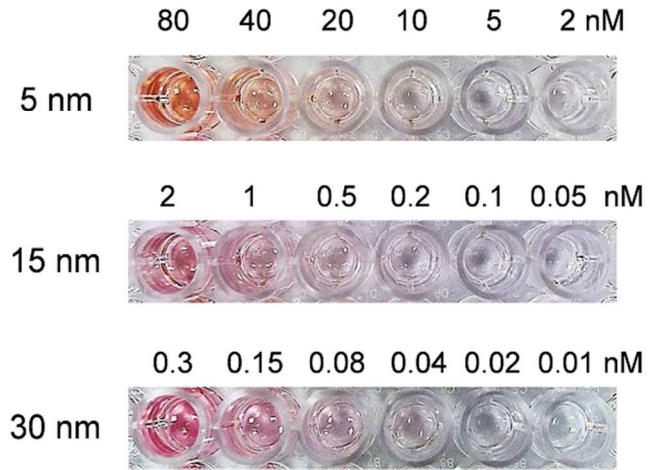

**Figure S1.** Color of various concentrations of AuNP solutions with different sizes of the particles.

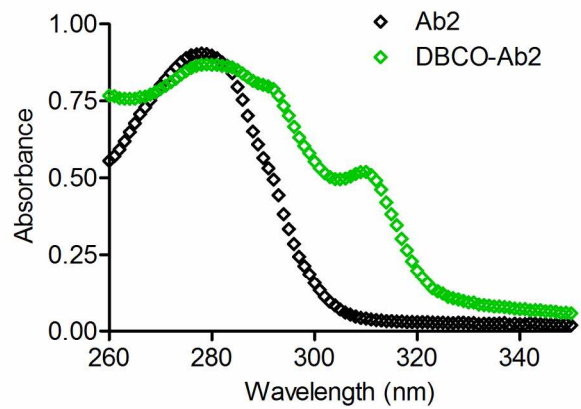

**Figure S2.** UV-vis absorption spectra of purified PSA detection antibody (black) and that labeled with dibenzocyclooctyl (DBCO) moieties (green). The absorption band at 309 nm indicates the DBCO moieties on Ab2.

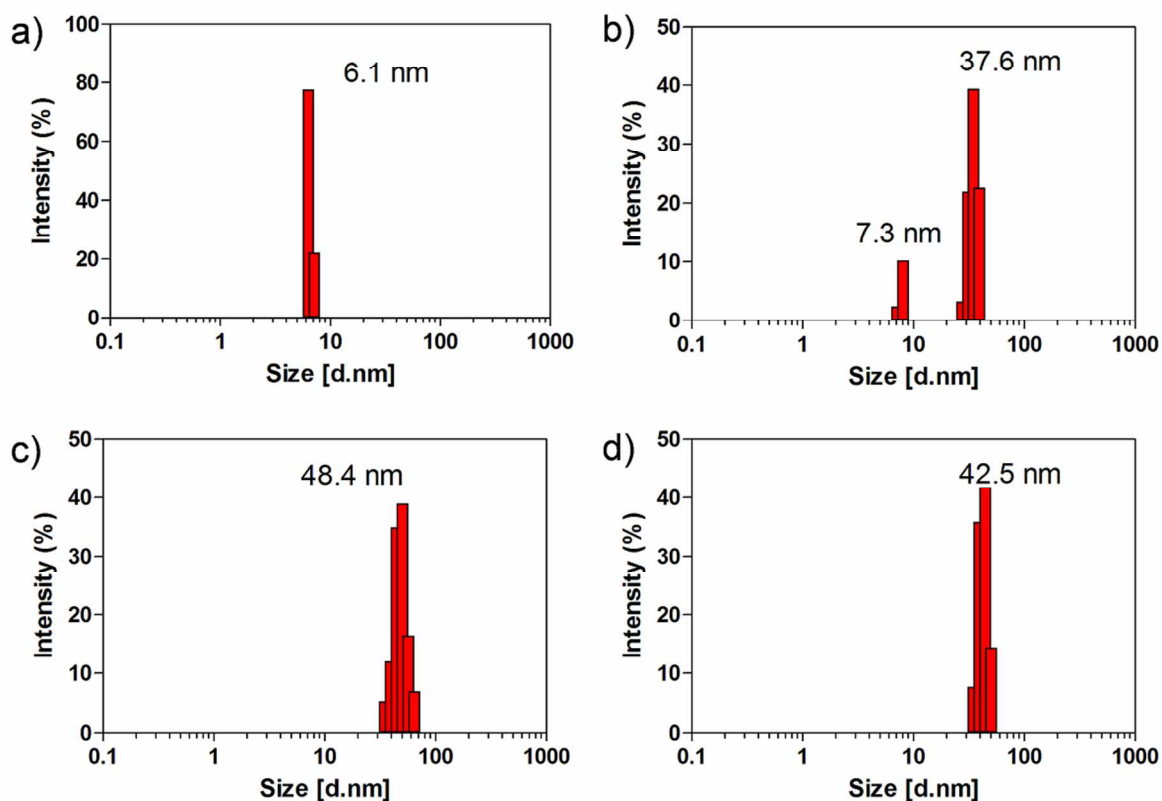

**Figure S3.** Dynamic light scattering (DLS) analysis of 5 nm AuNP seeds (a) and those in the presence of H<sub>2</sub>AuCl<sub>4</sub> (0.6 mM) and 10 (b), 100 (c), and 1000 (d) μM of H<sub>2</sub>O<sub>2</sub> respectively.

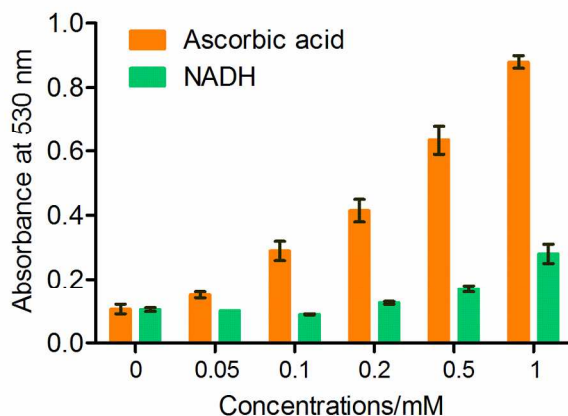

**Figure S4.** Various concentrations of ascorbic acid and nicotinamide adenine dinucleotide (NADH) cause the growth of 5 nm AuNPs respectively, which was indicated by the absorbance at 530 nm. Error bars show the standard deviations of three independent measurements.

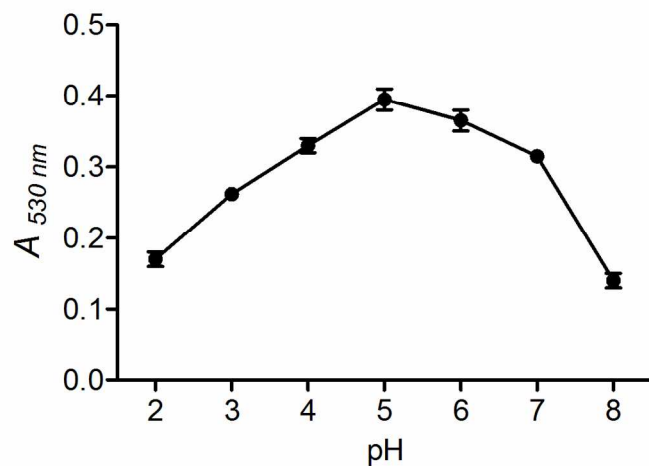

**Figure S5.** The effect of pH values on the biocatalytic reaction of glucose oxidase with glucose, which was monitored by the colorless-to-red assay. Error bars show the standard deviations of three independent measurements.

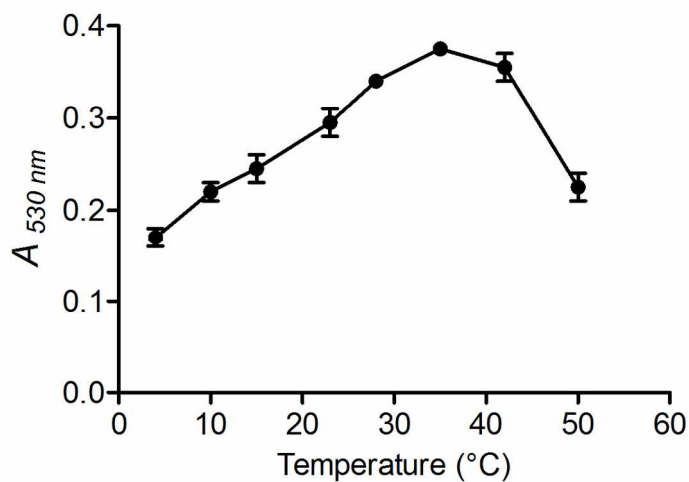

**Figure S6.** The effect of temperatures on the biocatalytic reaction of glucose oxidase with glucose, which was monitored by the colorless-to-red assay. Error bars show the standard deviations of three independent measurements.

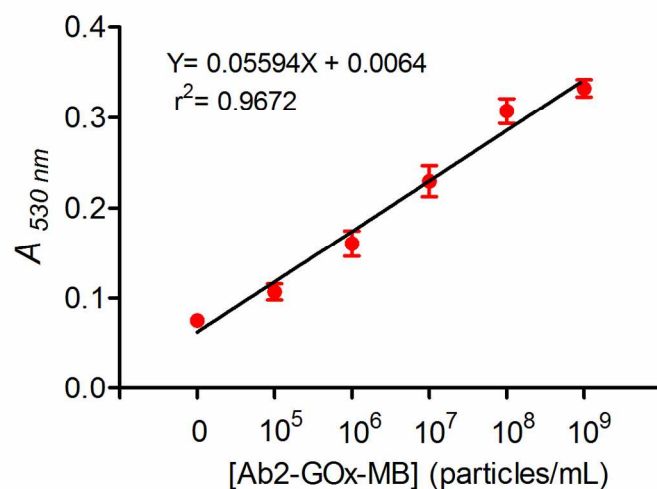

**Figure S7.** Detection of the colorless-to-red assay for various concentrations of Ab2-GOx-MB ranging from  $10^5$  to  $10^9$  particles/mL. Error bars show the standard deviations of three independent measurements.

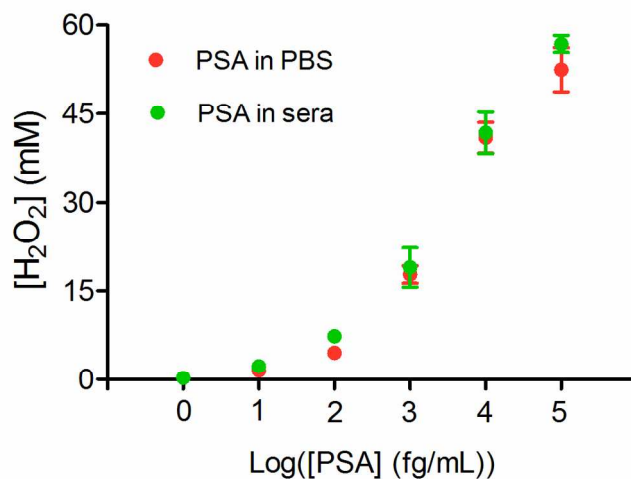

**Figure S8.** Measurements of the generated  $H_2O_2$  by a  $H_2O_2$  Assay Kit (ab102500) for various concentrations of PSA spiked in PBS and sera respectively. Error bars show the standard deviations of three independent measurements.

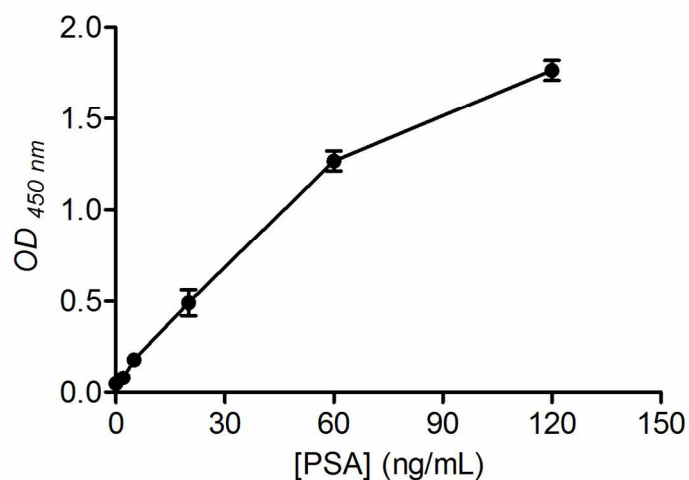

**Figure S9.** HRP-based ELISA for the detection of various concentrations of PSA spiked in fetal bovine sera. The OD values at 450 nm were recorded by a Synergy 2 Multi-Mode Microplate Reader. Error bars show the standard deviations of three independent measurements.

**Table S1** A comparison of detection performance for biosensors based on nanotechnology.

| Readout          | Target     | Nanomaterial | Linear range       | Detection limit | Real sample | Ref. |
|------------------|------------|--------------|--------------------|-----------------|-------------|------|
| Fluorescence     | PSA        | MPs          | N/A                | 1.5 fg/mL       | Serum       | [1]  |
| Fluorescence     | CEA        | Au film      | 0.2 pg/mL–20 ng/mL | 1 pg/mL         | Serum       | [2]  |
| Fluorescence     | Troponin I | Chimeric NPs | 0.1 pg/mL–10 ng/mL | 0.1 fg/mL       | Serum       | [3]  |
| Fluorescence     | CEA        | QDs          | 5 pg/mL–50 ng/mL   | 0.5 ng/mL       | Serum       | [4]  |
| Electrochemistry | IL-6       | SWNTs        | N/A                | 0.5 pg/mL       | Serum       | [5]  |
| Electrochemistry | IL-8       | MPs          | 1–500 fg/mL        | 1 fg/mL         |             | [6]  |
| Electrochemistry | Thrombin   | MPs          | 0.001–100 ng/mL    | 0.2 pg/mL       | N/A         | [7]  |
| Electrochemistry | CEA        | AuNPs        | 0.01–160 ng/mL     | 0.005 ng/mL     | Serum       | [8]  |
| Scanometric      | PSA        | AuNPs        | 0.1 fg–10 pg/mL    | 1 fg/mL         | N/A         | [9]  |
| Scanometric      | HIV        | AuNPs        | N/A                | N/A             | blood       | [10] |

|              |             |       |                              |                           |       |            |
|--------------|-------------|-------|------------------------------|---------------------------|-------|------------|
| SPR          | PSA         | MPs   | N/A                          | 10 fg/mL                  | Serum | [11]       |
| DLS          | PSA         | AuNPs | 0.1–10 ng/mL                 | 0.1 ng/mL                 | N/A   | [12]       |
| Raman        | aPR3        | SWNTs | N/A                          | 0.15 pg/ml                | Serum | [13]       |
| Raman        | VEGF        | AuNPs | 0.1–10 ng/mL                 | 7 fg/mL                   | Blood | [14]       |
| Plasmonics   | PSA         | AuNSs | $10^{-18}$ – $10^{-14}$ g/mL | $10^{-18}$ g/mL           | Serum | [15]       |
| Plasmonics   | HIV         | AuNPs | N/A                          | 98 ± 39 copies/mL         | Blood | [16]       |
| Colorimetric | PSA and P24 | AuNPs | N/A                          | $1 \times 10^{-18}$ g/mL  | Serum | [17]       |
| Colorimetric | PSA         | AuNPs | 0.05–20 ng/mL                | 0.03 ng/mL                | Serum | [18]       |
| Colorimetric | EV71        | AuNPs | N/A                          | $1 \times 10^4$ copies/mL | HTS   | [19]       |
| Colorimetric | PSA         | AuNPs | $10$ – $10^5$ fg/mL          | 4.6 fg/mL                 | Serum | This study |

*Abbreviation:* PSA, prostate-specific antigen; MPs, magnetic particles; N/A, not available; CEA, carcinoembryonic antigen; NPs, nanoparticles; QDs, quantum dots; IL-6, interleukin 6; SWNTs, single-walled carbon nanotubes; IL-8, interleukin 8; AuNPs, gold nanoparticles; aPR3, anti-proteinase 3; VEGF, vascular endothelial growth factor; EV71, enterovirus 71; HTS, human throat swab.

**Table S2** Extinction coefficients for gold nanoparticles with various sizes (the data was obtained from TED PELLA, INC. [http://www.tedpella.com/gold\\_html/gold-tec.htm](http://www.tedpella.com/gold_html/gold-tec.htm)).

| Size (nm)                                  | 5                   | 10                  | 15                  | 20                  | 30                  | 40                  | 50                     | 60                     | 80                     | 100                    |
|--------------------------------------------|---------------------|---------------------|---------------------|---------------------|---------------------|---------------------|------------------------|------------------------|------------------------|------------------------|
| Extinction coefficient ( $M^{-1}cm^{-1}$ ) | $9.696 \times 10^6$ | $9.550 \times 10^7$ | $3.640 \times 10^8$ | $9.406 \times 10^8$ | $3.585 \times 10^9$ | $9.264 \times 10^9$ | $1.935 \times 10^{10}$ | $3.531 \times 10^{10}$ | $9.124 \times 10^{10}$ | $1.905 \times 10^{11}$ |

## REFERENCES

- 1) Rissin, D. M.; Kan, C. W.; Campbell, T. G.; Howes, S. C.; Fournier, D. R.; Song, L.; Piech, T.; Patel, P. P.; Chang, L.; Rivnak, A. J.; Ferrell, E. P.; Randall, J. D.; Provuncher, G. K.; Walt, D. R.; Duffy, D. C. *Nat. Biotechnol.* **2010**, *28*, 595–599.
- 2) Tabakman, S. M.; Lau, L.; Robinson, J. T.; Price, J.; Sherlock, S. P.; Wang, H.; Zhang, B.; Chen, Z.; Tangsombatvisit, S.; Jarrell, J. A.; Utz, P. J.; Dai, H. *Nat. Commun.* **2011**, *2*, 466.
- 3) Park, J. S.; Cho, M. K.; Lee, E. J.; Ahn, K. Y.; Lee, K. E.; Jung, J. H.; Cho, Y.; Han, S. S.; Kim, Y. K.; Lee, J. *Nat. Nanotechnol.* **2009**, *4*, 259–264.
- 4) Hu, M.; Yan, J.; He, Y.; Lu, H.; Weng, L.; Song, S.; Fan, C.; Wang, L. *ACS Nano* **2010**, *4*, 488–494.
- 5) Malhotra, R.; Patel, V.; Vaqué, J. P.; Gutkind, J. S.; Rusling, J. F. *Anal. Chem.* **2010**, *82*, 3118–3123.
- 6) Munge, B. S.; Coffey, A. L.; Doucette, J. M.; Somba, B. K.; Malhotra, R.; Patel, V.; Gutkind, J. S.; Rusling, J. F. *Angew. Chem., Int. Ed.* **2011**, *50*, 7915–7918.
- 7) Xiang, Y.; Xie, M.; Bash, R.; Chen, J. J. L.; Wang, J. *Angew. Chem., Int. Ed.* **2007**, *46*, 9054–9056.
- 8) Tang, D.; Yuan, R.; Chai, Y. *Anal. Chem.* **2008**, *80*, 1582–1588.
- [9] Nam, J. M.; Thaxton, C. S.; Mirkin, C. A. *Science* **2003**, *301*, 1884–1886.
- 10) Chin, C. D.; Laksanasopin, T.; Cheung, Y. K.; Steinmiller, D.; Linder, V.; Parsa, H.; Wang, J.; Moore, H.; Rouse, R.; Umviligihozo, G.; Karita, E.; Mwambarangwe, L.; Braunstein, S. L.; van de Wijgert, J.; Sahabo, R.; Justman, J. E.; El-Sadr, W.; Sia, S. K. *Nat. Med.* **2011**, *17*, 1015–1019.
- 11) Krishnan, S.; Mani, V.; Wasalathanthri, D. P.; Kumar, C. V.; Rusling, J. F. *Angew. Chem., Int. Ed.* **2011**, *50*, 1175–1178.
- 12) Liu, X.; Dai, Q.; Austin, L.; Coutts, J.; Knowles, G.; Zou, J.; Chen, H.; Huo, Q. *J. Am. Chem. Soc.*, **2008**, *130*, 2780–2782.
- 13) Chen, Z.; Tabakman, S. M.; Goodwin, A. P.; Kattah, M. G.; Daranciang, D.; Wang, X.; Zhang, G.; Li, X.; Liu, Z.; Utz, P. J.; Jiang, K.; Fan, S.; Dai, H. *Nat. Biotechnol.* **2008**, *26*, 1285–1292.
- 14) Li, M.; Cushing, S. K.; Zhang, J.; Suri, S.; Evans, R.; Petros, W. P.; Gibson, L. F.; Ma, D.; Liu, Y.; Wu, N. Q. *ACS Nano* **2013**, *7*, 4967–4976.
- 15) Rodríguez-Lorenzo, L.; de la Rica, R.; Alvarez-Puebla, R. A.; Liz-Marzán, L. M.; Stevens, M. M. *Nat. Mater.* **2012**, *11*, 604–607.
- 16) Inci, F.; Tokel, O.; Wang, S.; Gurkan, U. A.; Tasoglu, S.; Kuritzkes, D. R.; Demirci, U. *ACS Nano* **2013**, *7*, 4733–4745.



- 17) De la Rica, R.; Stevens, M. M. *Nat. Nanotechnol.* **2012**, *7*, 821–824.
- 18) Gao, Z.; Xu, M.; Hou, L.; Chen, G.; Tang, D. *Anal. Chem.* **2013**, *85*, 6945–6952.
- 19) Liu, D.; Wang, Z.; Jin, A.; Huang, X.; Sun, X.; Wang, F.; Yan, Q.; Ge, S.; Xia, N.; Niu, G.; Liu, G.; Hight Walker, A. R.; Chen, X. *Angew. Chem., Int. Ed.* **2013**, *52*, 14065–14069.
